1    **SARS-CoV-2 in environmental samples of quarantined households**

2    Manuel Döhla<sup>a#</sup>, Gero Wilbring<sup>a#</sup>, Bianca Schulte<sup>b</sup>, Beate Mareike Kümmerer<sup>b</sup>, Christin  
3    Diegmann<sup>a</sup>, Esther Sib<sup>a</sup>, Enrico Richter<sup>b</sup>, Alexandra Haag<sup>a</sup>, Steffen Engelhart<sup>a</sup>, Anna Maria  
4    Eis-Hübinger<sup>b</sup>, Martin Exner<sup>a</sup>, Hendrik Streeck<sup>b‡</sup>, Ricarda Maria Schmithausen<sup>a\*</sup>

5

6    <sup>a</sup> Institute for Hygiene and Public Health, One Health Department, Medical Faculty, University  
7    of Bonn, Venusberg-Campus 1, 53127 Bonn, Germany

8    <sup>b</sup> Institute of Virology, Medical Faculty, University of Bonn, Venusberg-Campus 1, 53127 Bonn,  
9    Germany

10

11    # main authorship, contributed equally

12    ‡ senior authorship, contributed equally

13

14    \* **Corresponding author**

15    Dr. med. Dr. agr. Ricarda Maria Schmithausen  
16    Institute for Hygiene and Public Health,  
17    Faculty of Medicine,  
18    University Bonn,  
19    Bonn,  
20    Germany  
21    Tel.: +49 (0) 228 287-13452  
22    Fax: +49 (0) 228 287-15645  
23    E-mail address: ricarda.schmithausen@ukbonn.de

## 24 Highlights

- 25 • With public “shut downs” due to SARS-CoV-2, domestic infection is a main possible  
26 route of transmission.
- 27 • All analysed air samples were tested negative for SARS-CoV-2.
- 28 • 15.15 % of all wastewater samples (washbasin, showers and toilets) were tested  
29 positive.
- 30 • Only 3.36 % of all object samples were tested positive: one remote control, two metallic  
31 door knobs and one wooden stove overlay.
- 32 • This study supports the hypothesis that indirect environmental transmission may only  
33 play a minor role, which needs clarifications in further studies.

34

## 35 Abstract

36 The role of environmental transmission of SARS-CoV-2 remains unclear. Particularly the close  
37 contact of persons living together or cohabitating in domestic quarantine could result in high  
38 risk for exposure to the virus within the households. Therefore, the aim of this study was to  
39 investigate the whereabouts of the virus and whether useful precautions to prevent the  
40 dissemination can be given.

41 21 households under quarantine conditions were randomly selected for this study. All persons  
42 living in each household were recorded in terms of age, sex and time of household quarantine.  
43 Throat swabs for analysis were obtained from all adult individuals and most of the children. Air,  
44 wastewater samples and surface swabs (commodities) were obtained and analysed by RT-  
45 PCR. Positive swabs were cultivated to analyse for viral infectivity.

46 26 of all 43 tested adults (60.47 %) tested positive by RT-PCR. All 15 air samples were PCR-  
47 negative. 10 of 66 wastewater samples were positive for SARS-CoV-2 (15.15 %) as well as 4  
48 of 119 object samples (3.36 %). No statistically significant correlation between PCR-positive

49 environmental samples and the extent of infection spread inside the household could be  
50 observed. No infectious virus could be isolated under cell culture conditions.

51 As we cannot rule out transmission through surfaces, hygienic behavioural measures are  
52 important in the households of SARS-CoV-2 infected individuals to avoid potential  
53 transmission through surfaces. The role of the domestic environment, in particular the  
54 wastewater load in washbasins and showers, in the transmission of SARS CoV-2 should be  
55 further clarified.

56

## 57 **Keywords**

58 SARS-CoV-2; COVID-19; hygiene measures; environment; quarantine; airborne transmission

## 59 Introduction

60 The COVID-19 pandemic is one of the most important public health threats to the world since  
61 the Spanish flu around 100 years ago. Over 5 million cases and almost 350,000 deaths have  
62 been reported so far (WHO, 2020a, data as of 23rd may 2020). Thus, the COVID-19 pandemic  
63 challenges the environmental hygiene: special isolation and infectious disease wards have  
64 been established in hospitals and healthcare facilities and whole households have been  
65 quarantined. Hence, comprehensive monitoring of the environment of healthcare facilities and  
66 households during pandemic outbreaks are vital parts to ensure patients' safety and public  
67 health (Liu et al., 2020).

68 COVID-19 is a disease of the upper airways (Schmithausen et al., 2020). It has been shown  
69 for SARS-CoV-2 that droplets (particles  $> 5 \mu\text{m}$ ) can deposit on mucous surfaces of the upper  
70 respiratory tract and be spread when coughing, sneezing or speaking (Anfinrud et al., 2020; Li  
71 et al., 2020; Liu et al., 2020) Thus, the main airborne transmission pathway of infectious SARS-  
72 CoV-2 is aerosol (particles  $< 5 \mu\text{m}$ ) or droplets (van Doremalen et al., 2020). This is particularly  
73 important regarding indoor environments, because small particles with a higher viral load may  
74 be carried over distances up to 10 m from the emission source and may even accumulate  
75 (Morawska and Cao, 2020; Paules et al., 2020). However, these findings are based on  
76 laboratory experiments. One of a few on-field outbreaks studies on environmental transmission  
77 dynamics of SARS-CoV-2 was performed by Xu et al. (2020) on a cruise ship with a total of  
78 3,711 passengers. Xu et al. (2020) rebutted that long-range airborne transmission routes and  
79 even central air conditioning systems play a role in a COVID-19 outbreak in a confined space.  
80 On the other hand it can be assumed that close contact and fomites contribute to transmission  
81 effects (ECDC, 2020; WHO, 2020a). Chan et al. (2020) proofed person-to-person transmission  
82 in hospital and family settings. Currently, only few on-field studies of SARS-CoV-2 detected  
83 RNA on door handles and surfaces in hospital and/or confirmed COVID-19 in the patient's  
84 environment, particularly in Asia (Liu et al., 2020). However, the prevalence and potential

85 transmission risks of SARS-CoV-2 in the environment of infected persons of the general  
86 population living with their families in households have not yet been sufficiently explored.

87 One important underlying question is whether and how long virus particles can survive on  
88 various surfaces to enable human-to-surface-to-human transmission. To date, no case of  
89 transmission of SARS-CoV-2 from human to human via food, drinking water or fomites could  
90 be demonstrated, although if there is speculation that in the early phase of virus spread in  
91 China transmission might be food-borne associated (Jalava, 2020). Modelling also implies that  
92 the indirect transmission of SARS-CoV-2 from environment is of little importance (Ferretti et  
93 al., 2020). In contrast, recent studies suggested that the environmental stability of the virus on  
94 surfaces plays an important role in the transfer (Otter et al., 2016; van Doremalen et al., 2020).  
95 Studies also showed that the viable virus remained detectable for hours or even days in the  
96 inanimate surroundings like the air, on stainless steel and plastic surfaces (Kampf et al., 2020;  
97 Service, 2020) as well as in urine and faeces of formerly positive patients (Holshue et al., 2020;  
98 Wang et al., 2020c; Wang et al., 2020b). SARS-CoV-2 RNA has been detected in the stool of  
99 one of the first patients in the USA (Holshue et al., 2020). This might be in line with the  
100 observation of Wang et al. (2020) and Cheng et al. (2020) describing that at least 2–10% of  
101 patients with COVID-19 show gastrointestinal symptoms such as diarrhoea and vomiting  
102 (Chen et al., 2020; Wang et al., 2020a). Schmithausen et al. (2020) described persistent  
103 diarrhoea in 32% of tested persons. Following the wastewater pathway, SARS-CoV-2 RNA  
104 has already been found in the wastewater of hospitals treating COVID-19 patients (Wang et  
105 al., 2020c). In a lab-based experiment, coronavirus (SARS-CoV-1) was found to remain  
106 infectious for 14 days at 4°C, and for 2 days at 20°C in hospital wastewater (Wang et al., 2005).  
107 Yeo et al. (2020) highlight the potential of faecal-oral transmission. Thus, wastewater and  
108 sanitation units represent potential infectious sources of SARS-CoV-2 and colonization of the  
109 sewage system with microorganisms already starts in the siphons of the washbasins, shower  
110 siphons, as well as in the toilets (KRINKO, 2020; Sib et al., 2019). When SARS-CoV-2 infected  
111 persons with gastrointestinal symptoms excrete urine and faeces, consequently SARS-CoV-2  
112 can be identified in the immediate surroundings like the sanitary facilities. While the elimination

113 of SARS-CoV-2 in wastewaters is possible after treatment (Holshue et al., 2020; Zhang et al.,  
114 2020), the possibility of faecal–oral recirculation of SARS-CoV-2 from siphons of washbasins  
115 and showers as well toilets to humans via droplets or aerosols or even smear-infection is still  
116 unclear. In order to test this assumption, the study presented here also collected on-field  
117 samples of siphons and toilets in private households of COVID-19 infected people.

118 The main exposure to and transmission of the virus occurs at home (Qian et al., 2020), and in  
119 cases of mild COVID-19 progression, home care is implemented to avoid hospital overload  
120 (WHO, 2020b). Consequently, contact persons of positively tested people are also placed in  
121 pre-emptive home isolation before the onset of symptoms due to the risk of contagion (ECDC,  
122 2020; WHO, 2020b). As a result, infected people and contact persons living together as a  
123 family or in cohabitation are in domestic quarantine with each other. Even with separate  
124 bathrooms and bedrooms, it is impossible to effectively and permanently distance oneself and  
125 maintain adequate hand hygiene.

126 The aim of this study was to investigate the dissemination of virus in air, wastewater and on  
127 items within the domestic environment of family households with at least one SARS-CoV-2  
128 positive family member, during a quarantine ordered by the local health department and to give  
129 useful recommendations for infection prevention.

## 130 **Material and Methods**

### 131 **Sample site and recruitment of households**

132 Samples were obtained in a high-prevalence community setting with Germany's first largest  
133 high-prevalence cluster with regard to COVID-19 known at that point of time in March 2020  
134 (Streeck et al., 2020b; Streeck et al., 2020a). The local health department provided lists of all  
135 positively tested inhabitants who had been placed in domestic quarantine at the point of data  
136 collection. 21 households, with at least one person tested positive for SARS-CoV-2 RNA, were  
137 randomly selected from this list. The respective residents were contacted by telephone and  
138 informed about the study. All persons and their family members living under one roof agreed

139 to participate in the study. Complete information from pharyngeal swabs was available for all  
140 58 study participants (43 adults, 15 children) living in 21 households.

## 141 **Sampling**

142 Age, sex and time of quarantine were recorded for all individuals living in each household.  
143 Household was defined as people living together within one flat or one house and having  
144 regularly and close contact nearly every day. Throat swabs for virologic diagnostics were  
145 obtained from all adults described by Streeck et al. (2020b).

146 As this is an exploratory study, no standardised environmental sampling was carried out.  
147 Furthermore, no characterization of cleaning methods or materials was performed. Critical  
148 rooms and fomites were identified in each household by two researchers (physicians or  
149 virologists or hygienists or public health specialists) in cooperation with the residents. The  
150 focus of this study was on the air, wastewater and swab samples of as many different fomites  
151 (consumer goods and furnishings) as possible with the WHO “how to” guide as a reference  
152 (WHO, 2020c).

153 Air samples were obtained employing cyclone sampling (Verreault et al., 2008) via Coriolis  
154 Micro – Air sampler (Bertin Technologies SAS, France). The air collectors were positioned in  
155 the middle of the room that was used most frequently by the residents; this was usually the  
156 living room or the kitchen - all the rooms had no ventilation equipment. During sampling, close  
157 contact to the air sampler (e.g. speaking in a range below 2 metres but not above 3 metres)  
158 was avoided. Sampling was performed with 300 litres per minute for 10 minutes in 15 ml of 0.9  
159 % NaCl.

160 Wastewater samples were obtained using sterile syringes and catheters to reach the  
161 wastewater in the siphons of sinks, showers and toilets in bathrooms. Samples were only taken  
162 when the sanitary facilities were shared between the residents. The air and wastewater  
163 samples were stored and transported at +4°C.

164 Fomite samples were taken using a swab with a synthetic tip and a plastic shaft  
165 (FLOQSwabs™, Copan, Italy) and added PBS, with 2 ml of 0.9 % NaCl including neutralizing  
166 buffer to counteract the effects of any residual disinfectant (WHO, 2020c). The residents  
167 identified fomites of frequent and shared use (e.g. door handles, remote control). All laboratory  
168 analyses were performed within 48 hours.

## 169 **Laboratory analysis**

170 All samples were transported to the virologic laboratory within 6 hours of sampling. Virologic  
171 analysis was performed via RT-PCR using the protocol of Corman et al. (2020). Briefly, swab  
172 samples were homogenized by short vortexing and 140 µl of the sample were transferred to a  
173 sterile 2 ml microcentrifuge tube holding 560 µl AVL buffer (Qiagen). Viral RNA was extracted  
174 with the QIAamp Viral RNA Mini kit (Qiagen) according to the instructions of the manufacturer.  
175 The RNA was used as template for three real time RT-PCR reactions using SuperScript™III  
176 One-Step RT-PCR System with Platinum™ TaqDNA Polymerase (Thermo Fisher) to amplify  
177 sequences of the SARS-CoV-2 E gene (primers E\_Sarbeco\_F and R, probe E\_Sarbeco\_P1),  
178 the RdRP gene (primers RdRP\_SARSr\_F, and R, and probe RdRP\_SARSr-P2), and an  
179 internal control for RNA extraction, reverse transcription, and amplification (innuDETECT  
180 Internal Control RNA Assay, Analytik Jena #845-ID-0007100). Samples were considered  
181 positive for SARS-CoV-2 if amplification occurred in both virus-specific reactions.

182 The isolation of infectious virus from environmental samples was attempted by seeding Vero  
183 E6 cells in 24 well plates or T25 flasks at a density of 70-80 %. Cells were incubated with 200  
184 µl (24 well) – 1000 µl (T25 flask) of the sample material supplemented with 1x  
185 penicillin/streptomycin/amphotericin B and incubated for 1 h at 37°C in 5 % CO<sub>2</sub>. For water  
186 samples, 10% (v/v) of inoculation volume was replaced by 10xPBS to obtain a final  
187 concentration of 1xPBS. After 1 h of incubation, the inoculum was removed, Dulbecco's  
188 Modified Eagle's medium (Gibco) with 3 % foetal bovine serum (Gibco) and 1x  
189 penicillin/streptomycin/amphotericin B was added. Cells were incubated over several days at



190 37°C, 5 % CO<sub>2</sub> and observed for development of a cytopathic effect that typically occurs for  
191 growth of SARS-CoV-2 on Vero E6 cells.

## 192 **Statistical analysis**

193 Statistical analysis was performed via Stata IC 15.1 (StataCorp, USA). An  $\alpha = 0.05$  was  
194 considered statistically significant and all tests were 2-tailed. The factors associated with  
195 environmental contamination were analysed using nonparametric tests for continuous  
196 variables. The  $\chi^2$ -Test or Fisher exact test were used to analyse categorical variables.

## 197 **Results**

### 198 **Household data**

199 In total, data from 21 households were included in the analysis. The profile of all investigated  
200 households is shown in table 1.

201 *Table 1: Household data*

|                                | Total | Per Household |               |               |
|--------------------------------|-------|---------------|---------------|---------------|
|                                |       | Median        | IQR           | Range         |
| Number of households           | 21    |               |               |               |
| Number of adults ( $\geq 18$ ) | 43    | 2             | 2 – 2         | 1 – 4         |
| Number of children (<18)       | 15    | 0             | 0 – 2         | 0 – 3         |
| Proportion of females (%)      | 51.72 | 50.00         | 50.00 – 66.67 | 0.00 – 100.00 |
| Median household age (years)   |       | 31.00         | 28.00 – 53.00 | 9.50 – 75.00  |
| Time of quarantine (days)      |       | 5             | 5 – 6         | 0 – 6         |

202  
203 Of the pharyngeal swab samples obtained from all 43 adults, 26 (60.47 %) tested positive by  
204 RT-PCR. The median number of adults testing positive was one per household (IQR: 1 – 2);  
205 in two households no PCR-positive person was discovered. We obtained samples from 9  
206 children, with 4 of them tested positive (44.44 %). There was no association between positive  
207 adults and children within our study group (exact test,  $p = 0.469$ ). The proportion of PCR-

208 positive children was significant lower as the proportion of PCR-positive adults (binomial test,  
209  $p = 0.016$ ).

## 210 Environmental sampling data

211 200 environmental samples (15 air samples [7.50 %], 66 wastewater samples [33.00 %], 119  
212 object swabs [59.05 %]) from 21 households were included in the analysis. The median  
213 number of samples per household was 9 (IQR: 7 – 13, Min: 1, Max: 18). 14 samples (7.00 %)  
214 tested positive using RT-PCR. Overall, 14 samples (7.00 %) tested positive. Table 2 shows  
215 the number of PCR-positive samples considering the sample type. The observed differences  
216 in positivity between the sample types are significant ( $\chi^2$ -Test,  $p = 0.011$ ). Infectious virus could  
217 not be isolated in Vero E6 cells from any environmental sample.

218 *Table 2: PCR-status of different sample types.*

| Sample type        | PCR-negative  | PCR-positive | Total number tested |
|--------------------|---------------|--------------|---------------------|
| Air samples        | 15 (100 %)    | 0 (0 %)      | 15 (100 %)          |
| Wastewater samples | 56 (84.85 %)  | 10 (15.15 %) | 66 (100 %)          |
| Object samples     | 115 (96.64 %) | 4 (3.36 %)   | 119 (100 %)         |
| Total              | 186 (93.00 %) | 14 (7.00 %)  | 200 (100 %)         |

219  
220 As shown in table 2, wastewater samples were most commonly tested positive for SARS-CoV-  
221 2 RNA (15.15 %). For further analysis, four wastewater-subtypes were categorised:  
222 Washbasin siphons, shower siphons, toilet and process water. Table 3 shows the positive  
223 samples within these subtypes. No significance between wastewater subtype and detection of  
224 SARS-CoV-2-status was observed ( $\chi^2$ -Test,  $p = 0.700$ ).

225 *Table 3: PCR-status of wastewater sample subtypes.*

| Sample subtype    | PCR-negative | PCR-positive | Total number tested |
|-------------------|--------------|--------------|---------------------|
| Washbasin siphons | 21 (80.77 %) | 5 (19.23 %)  | 26 (100 %)          |
| Shower siphons    | 13 (81.25 %) | 3 (18.75 %)  | 16 (100 %)          |

|                           |              |              |            |
|---------------------------|--------------|--------------|------------|
| Toilet                    | 21 (91.30 %) | 2 (8.70 %)   | 23 (100 %) |
| Other                     | 1 (100 %)    | 0 (0 %)      | 1 (100 %)  |
| Total wastewater samples: | 56 (84.85 %) | 10 (15.15 %) | 66 (100 %) |

226

227 In addition, the fomite samples were divided into six subtypes for further analysis: "Electronic  
 228 devices", "Knobs and handles", "Plants and animals", "Furniture and furnishings", "Foods and  
 229 drinks" and "Clothing". Table 4 shows the results of PCR analysis within the subtypes. There  
 230 was no significant association between object subtype and PCR-status ( $\chi^2$ -Test,  $p = 0.843$ ).

231 *Table 4: PCR-status of different fomite sample subtypes.*

| Sample subtype           | PCR-negative  | PCR-positive | Total number tested |
|--------------------------|---------------|--------------|---------------------|
| Electronic devices       | 51 (98.08 %)  | 1 (1.92 %)   | 52 (100 %)          |
| Knobs and handles        | 29 (93.55 %)  | 2 (6.45 %)   | 31 (100 %)          |
| Plants and animals       | 11 (100 %)    | 0 (0 %)      | 11 (100 %)          |
| Furniture and furnishing | 18 (94.74 %)  | 1 (5.26 %)   | 19 (100 %)          |
| Foods and drinks         | 4 (100 %)     | 0 (0 %)      | 4 (100 %)           |
| Clothing                 | 2 (100 %)     | 0 (0 %)      | 2 (100 %)           |
| Total object samples:    | 115 (96.64 %) | 4 (3.36 %)   | 119 (100 %)         |

232

233 Four fomite samples tested positive (3.36 %), i.e. an electronic device (remote control), two  
 234 metallic doorknobs and one wooden stove overlay.

235 No significant association between positive wastewater samples and positive object samples  
 236 was observed ( $\chi^2$ -Test,  $p = 0.851$ , data not shown).

### 237 **Associations between human and environmental data**

238 No statistically significant correlation could be observed between the household information  
 239 collected and the detection of SARS-CoV-2 RNA in the environmental samples ( $\chi^2$ -Test,  $p =$   
 240 0.148). The households with positive environmental PCR results were further analysed with

241 regard to the number of adults ( $\chi^2$ -Test,  $p = 0.249$ ), the number of children ( $\chi^2$ -Test,  $p = 0.263$ ),  
242 the proportion of females ( $\chi^2$ -Test,  $p = 0.410$ ), the median age per household ( $\chi^2$ -Test,  $p =$   
243  $0.453$ ) and the time of quarantine ( $\chi^2$ -Test,  $p = 0.459$ ). No correlation between PCR-positive  
244 environmental samples and PCR-positive human samples could be found in this study ( $\chi^2$ -  
245 Test,  $p = 0.756$ ). There was no household with PCR-positive environmental samples and PCR-  
246 negative human samples.

## 247 Discussion

248 The results indicate that at that early time of SARS-CoV-2 outbreak research in Germany the  
249 contamination of the domestic environment is negligible during quarantine measured with the  
250 current state of the art methods. We could not detect any viral RNA in air samples and only  
251 3.36 % of all fomite samples. In contrast, 15.15 % of all wastewater samples were positive for  
252 SARS-CoV-2 RNA, which indicates that mouthwash in washbasins, body wash in the shower  
253 and faeces in toilets and therefore wastewater could pose a relevant exposure (Wu et al.,  
254 2020). Although RT-PCR is a highly sensitive detection method it does not yield information  
255 on the infectivity of the virus in these samples. Attempts to isolate virus in cell culture were not  
256 successful. Given the rather low cycle threshold (CT) values  $>30$  obtained in the RT-PCR  
257 analysis of these samples, the amount of potential virus is estimated to be too low for virus  
258 isolation in general. Indeed, virus isolation in cell culture has not been successful in our  
259 laboratory at a CT value  $>30$  so far. Furthermore, several wastewater samples had a toxic  
260 effect on the cells, which might be linked to detergent residues. It is therefore difficult to give  
261 specific hygienic behaviour precautions but rather basic hygiene measures for dissemination  
262 prevention (KRINKO, 2020).

263 With regard to the fomite and surface samples, only few positive PCR results were found in  
264 this study. This might also be due to methodological problems. On the one hand, the  
265 swab/transport solution combinations used could not have been suitable for keeping viral RNA  
266 stable until it was analysed in the laboratory. Ideally, object swabs should cover  $25 \text{ cm}^2$  and  
267 be put into 2 ml of viral transport medium including neutralizing buffer to counteract the effects

268 of any residual disinfectant or degrading enzymes (WHO, 2020c). On the other hand, we  
269 observed positive PCR results in the throat swabs that were collected by the same  
270 swab/transport combinations. Assuming that the results are not methodologically  
271 inappropriate, they could indicate that the environmental survival of SARS-CoV-2 may not be  
272 too long in the domestic environment. The survival times of SARS-CoV-2 on various dry  
273 materials for different periods of time (< 3 hours on printing and tissue papers, < 2 days on  
274 wood and clothing, < 4 days on smooth surfaces, < 7 days on steel or plastic) were investigated  
275 by (Chin et al., 2020). However, it should be noted that these data were generated under  
276 laboratory conditions. It can be assumed that households in quarantine have a cleaning  
277 regime, but even under these conditions viral RNA could be found on fomites in the  
278 households. A further characterization of different cleaning systems (frequency, cleaning  
279 agents, ventilation of rooms, etc.) would be necessary; however, this effect could only be  
280 validly estimated in observational studies, since a large bias towards social desirability can be  
281 expected in surveys.

282 Following international recommendations, air samples should be taken as swabs of ventilation  
283 exits or air purifier vents (WHO, 2020c). Since this is just a surrogate for real air contamination  
284 and normally households in Germany are not equipped with ventilators or air purifiers, cyclone  
285 air samplers were used. Cyclone samplers may be less efficient than other sampler types at  
286 recovering low concentrations of airborne viruses due to the physical stress caused by  
287 centrifugal force (Bourgueil et al., 1992). However, a recent study using a cyclone air collector  
288 to investigate air contamination in isolation rooms of a hospital (Chia et al., 2020) showed that  
289 2 out of 3 collected samples were positive for SARS-CoV-2 RNA. Further experimental  
290 investigations of different air samplers in defined environments and preferably concerning  
291 general population households would be necessary to exclude a method-related false low  
292 recovery rate. However, these findings suggest that droplet transmission is the main pathway  
293 of transmission and that aerosol transmission plays a rather minor role. According to this,  
294 droplets and/or aerosols with SARS-CoV-2 in a viable and infectious form can be formed while

295 flushing open toilets without closed lids or arise from contaminated siphons and thus could  
296 become a transmission pathway.

297 With regard to the results of the wastewater samples in our study, the percentage of positive  
298 samples was lowest in toilets (8.70 %), higher in shower siphons (18.75 %) and highest in  
299 washbasin siphons (19.23 %). Although these differences were not found to be significant,  
300 they support the above-mentioned hypothesis that aerosolization of viral loaded droplets from  
301 these wastewater reservoirs can be possible. Even more, the viral load on the hands and in  
302 the throat is highest and viral particles can be released from spitting into the washing basin  
303 siphon after teeth brushing or hands washing. The excretion of SARS-CoV-2 RNA via faeces  
304 and urine has already been described (van Doremalen et al., 2020) and could also lead to an  
305 increased detection rate of viral RNA in the shower or toilet.

306 Thus, the wastewater system could serve as a possible surveillance system for the circulation  
307 of the virus within several environments (Medema et al., 2020). In general, wastewater requires  
308 special hygienic attention, for example with regard to multidrug-resistant bacteria and antibiotic  
309 residues (Müller et al., 2018; Sib et al., 2019; Voigt et al., 2020; Voigt et al., 2019), enteric  
310 viruses like norovirus or rotavirus (Lodder and Roda Husman, 2005) and coronavirus (Gundy  
311 et al., 2009). The enteric transmission of SARS-CoV led to a large outbreak cluster in  
312 Hongkong in 2003 (Leung et al., 2003). In addition, enteric dissemination of and exposure to  
313 SARS-CoV-2 via wastewater is also considered to be a main risk (Lodder and Roda Husman,  
314 2020). Therefore, existing hygiene recommendations (washing hands after contact with  
315 wastewater, flushing the toilet with closed lid, avoiding re-contamination of drinking water  
316 systems and domestic environment by wastewater) are considered to be necessary to  
317 sufficiently control this transmission route. Furthermore, preventive and intervention measures  
318 should not start at the wastewater treatment in the treatment plant, but already in the immediate  
319 surroundings of the patient, in order to minimize the infection potential.

## 320 Conclusions

321 The domestic environment predominantly does not seem to pose a high risk for transmission  
322 of SARS-CoV-2. Surfaces in the domestic environment did not show a high contamination rate  
323 in this study, whereas the detection of viral RNA in wastewater of washbasins, showers and  
324 toilets showed a significantly higher contamination with SARS-CoV-2, indicating a possible  
325 reservoir that has not been considered so far. However, further systematic studies with an  
326 adapted methodology should be performed to investigate the contamination of the domestic  
327 environment and the interactions between humans, animals and the environment.  
328 Furthermore, the possibility of transmission via wastewater has hygienic implications for  
329 systematic prevention measures especially for areas with poor sanitation (Carducci et al.  
330 2020).

## 331 Declaration of competing interest

332 The authors declare no conflict of interest. This study complies with the ethical guidelines of  
333 the declaration of Helsinki by the “world medical association” from 1964 and its subsequent  
334 revisions. The ethics committee of the Medical Faculty of the University of Bonn was involved  
335 and approved the procedures and the publication of the results (reference no. 085/20).

## 336 Acknowledgements

337 We thank all persons and families for their active and committed participation in this study. We  
338 thank the team of Dr. H. Schößler of the Local Health Authority in Heinsberg for their  
339 cooperation and trust. We thank S. Pusch, the chief administrator of the Heinsberg district, and  
340 his supportive and professional team for giving us the opportunity to perform this study. We  
341 also thank Professor G. Bierbaum for giving expert advice. We gratefully acknowledge S.  
342 Tietjen and L. Sommer for on-site support. We are indebted to the Institute of Animal Sciences  
343 of the Agricultural Faculty of the University of Bonn for providing technical support.

## 344 Funding

345 The personal for this work was in part funded by the BMBF (Federal Ministry of Education and  
346 Research of Germany) funding measure 'HyReKA' which is part of 'Risk management of new  
347 pollutants and pathogens in the water cycle (RiSKWa)' in the funding priority 'Sustainable  
348 Water Management (NaWaM)' [grant number FKZ02WRS1377].

349 Further personal was in parts funded by the BONFOR funding programme (Instrument 2) of  
350 the Medical Faculty University of Bonn [grant number 2018-2-03].

351

## 352 References

- 353 Anfinrud, P., Stadnytskyi, V., Bax, C.E., Bax, A., 2020. Visualizing Speech-Generated Oral Fluid  
354 Droplets with Laser Light Scattering. *The New England journal of medicine*.  
355 <https://doi.org/10.1056/NEJMc2007800>.
- 356 Bourgueil, E., Hutet, E., Cariolet, R., Vannier, P., 1992. Air sampling procedure for evaluation of viral  
357 excretion level by vaccinated pigs infected with Aujeszky's disease (pseudorabies) virus. *Research*  
358 *in Veterinary Science* 52 (2), 182–186. [https://doi.org/10.1016/0034-5288\(92\)90008-P](https://doi.org/10.1016/0034-5288(92)90008-P).
- 359 Chen, N., Zhou, M., Dong, X., Qu, J., Gong, F., Han, Y., Qiu, Y., Wang, J., Liu, Y., Wei, Y., Xia, J.'a., Yu, T.,  
360 Zhang, X., Zhang, L., 2020. Epidemiological and clinical characteristics of 99 cases of 2019 novel  
361 coronavirus pneumonia in Wuhan, China: a descriptive study. *The Lancet* 395 (10223), 507–513.  
362 [https://doi.org/10.1016/S0140-6736\(20\)30211-7](https://doi.org/10.1016/S0140-6736(20)30211-7).
- 363 Chia, P.Y., Coleman, K.K., Tan, Y.K., Ong, S.W.X., Gum, M., Lau, S.K., Sutjipto, S., Lee, P.H., Son, T.T.,  
364 Young, B.E., Milton, D.K., Gray, G.C., Schuster, S., Barkham, T., De, P.P., Vasoo, S., Chan, M., Ang,  
365 B.S.P., Tan, B.H., Leo, Y.S., Ng, O.-T., Wong, M.S.Y., Marimuthu, K., 2020. Detection of Air and  
366 Surface Contamination by Severe Acute Respiratory Syndrome Coronavirus 2 (SARS-CoV-2) in  
367 Hospital Rooms of Infected Patients.
- 368 Chin, A.W.H., Chu, J.T.S., Perera, M.R.A., Hui, K.P.Y., Yen, H.-L., Chan, M.C.W., Peiris, M., Poon, L.L.M.,  
369 2020. Stability of SARS-CoV-2 in different environmental conditions. *The Lancet Microbe*.  
370 [https://doi.org/10.1016/S2666-5247\(20\)30003-3](https://doi.org/10.1016/S2666-5247(20)30003-3).
- 371 Corman, V.M., Landt, O., Kaiser, M., Molenkamp, R., Meijer, A., Chu, D.K., Bleicker, T., Brünink, S.,  
372 Schneider, J., Schmidt, M.L., Mulders, D.G., Haagmans, B.L., van der Veer, B., van den Brink, S.,  
373 Wijsman, L., Goderski, G., Romette, J.-L., Ellis, J., Zambon, M., Peiris, M., Goossens, H., Reusken,  
374 C., Koopmans, M.P., Drosten, C., 2020. Detection of 2019 novel coronavirus (2019-nCoV) by real-  
375 time RT-PCR. *Euro surveillance : bulletin Europeen sur les maladies transmissibles = European*  
376 *communicable disease bulletin* 25 (3). <https://doi.org/10.2807/1560-7917.ES.2020.25.3.2000045>.
- 377 ECDC, 2020. Contact tracing: Public health management of persons, including healthcare workers,  
378 having had contact with COVID-19 cases in the European Union.



- 379 Ferretti, L., Wymant, C., Kendall, M., Zhao, L., Nurtay, A., Abeler-Dörner, L., Parker, M., Bonsall, D.,  
380 Fraser, C., 2020. Quantifying SARS-CoV-2 transmission suggests epidemic control with digital  
381 contact tracing. *Science (New York, N.Y.)*. <https://doi.org/10.1126/science.abb6936>.
- 382 Gundy, P.M., Gerba, C.P., Pepper, I.L., 2009. Survival of Coronaviruses in Water and Wastewater.  
383 *Food Environ Virol* 1 (1). <https://doi.org/10.1007/s12560-008-9001-6>.
- 384 Holshue, M.L., DeBolt, C., Lindquist, S., Lofy, K.H., Wiesman, J., Bruce, H., Spitters, C., Ericson, K.,  
385 Wilkerson, S., Tural, A., Diaz, G., Cohn, A., Fox, L., Patel, A., Gerber, S.I., Kim, L., Tong, S., Lu, X.,  
386 Lindstrom, S., Pallansch, M.A., Weldon, W.C., Biggs, H.M., Uyeki, T.M., Pillai, S.K., 2020. First Case  
387 of 2019 Novel Coronavirus in the United States. *The New England journal of medicine* 382 (10),  
388 929–936. <https://doi.org/10.1056/NEJMoa2001191>.
- 389 Jalava, K., 2020. First respiratory transmitted food borne outbreak? *International journal of hygiene  
390 and environmental health* 226, 113490. <https://doi.org/10.1016/j.ijheh.2020.113490>.
- 391 Kampf, G., Todt, D., Pfaender, S., Steinmann, E., 2020. Persistence of coronaviruses on inanimate  
392 surfaces and their inactivation with biocidal agents. *The Journal of hospital infection* 104 (3),  
393 246–251. <https://doi.org/10.1016/j.jhin.2020.01.022>.
- 394 KRINKO, 2020. Anforderungen der Hygiene an abwasserführende Systeme in medizinischen  
395 Einrichtungen. *Bundesgesundheitsblatt, Gesundheitsforschung, Gesundheitsschutz* 63 (4), 484–  
396 501. <https://doi.org/10.1007/s00103-020-03118-7>.
- 397 Leung, W.K., To, K.-f., Chan, P.K.S., Chan, H.L.Y., Wu, A.K.L., Lee, N., Yuen, K.Y., Sung, J.J.Y., 2003.  
398 Enteric involvement of severe acute respiratory syndrome-associated coronavirus infection1  
399 1The authors thank Man-yeung Yung, Sara Fung, Dr. Bonnie Kwan, and Dr. Thomas Li for their help  
400 in retrieving patient information. *Gastroenterology* 125 (4), 1011–1017.  
401 <https://doi.org/10.1016/j.gastro.2003.08.001>.
- 402 Li, Q., Guan, X., Wu, P., Wang, X., Zhou, L., Tong, Y., Ren, R., Leung, K.S.M., Lau, E.H.Y., Wong, J.Y.,  
403 Xing, X., Xiang, N., Wu, Y., Li, C., Chen, Q., Li, D., Liu, T., Zhao, J., Liu, M., Tu, W., Chen, C., Jin, L.,  
404 Yang, R., Wang, Q., Zhou, S., Wang, R., Liu, H., Luo, Y., Liu, Y., Shao, G., Li, H., Tao, Z., Yang, Y.,  
405 Deng, Z., Liu, B., Ma, Z., Zhang, Y., Shi, G., Lam, T.T.Y., Wu, J.T., Gao, G.F., Cowling, B.J., Yang, B.,  
406 Leung, G.M., Feng, Z., 2020. Early Transmission Dynamics in Wuhan, China, of Novel Coronavirus-  
407 Infected Pneumonia. *The New England journal of medicine* 382 (13), 1199–1207.  
408 <https://doi.org/10.1056/NEJMoa2001316>.
- 409 Liu, J., Liao, X., Qian, S., Yuan, J., Wang, F., Liu, Y., Wang, Z., Wang, F.-S., Liu, L., Zhang, Z., 2020.  
410 Community Transmission of Severe Acute Respiratory Syndrome Coronavirus 2, Shenzhen, China,  
411 2020. *Emerging infectious diseases* 26 (6). <https://doi.org/10.3201/eid2606.200239>.
- 412 Lodder, W., Roda Husman, A.M. de, 2020. SARS-CoV-2 in wastewater: potential health risk, but also  
413 data source. *The Lancet Gastroenterology & Hepatology*. [https://doi.org/10.1016/S2468-  
414 1253\(20\)30087-X](https://doi.org/10.1016/S2468-1253(20)30087-X).
- 415 Lodder, W.J., Roda Husman, A.M. de, 2005. Presence of noroviruses and other enteric viruses in  
416 sewage and surface waters in The Netherlands. *Applied and environmental microbiology* 71 (3),  
417 1453–1461. <https://doi.org/10.1128/AEM.71.3.1453-1461.2005>.
- 418 Medema, G., Heijnen, L., Elsinga, G., Italiaander, R., Brouwer, A., 2020. Presence of SARS-  
419 Coronavirus-2 in sewage.
- 420 Morawska, L., Cao, J., 2020. Airborne transmission of SARS-CoV-2: The world should face the reality.  
421 *Environment international* 139, 105730. <https://doi.org/10.1016/j.envint.2020.105730>.
- 422 Müller, H., Sib, E., Gajdiss, M., Klanke, U., Lenz-Plet, F., Barabasch, V., Albert, C., Schallenberg, A.,  
423 Timm, C., Zacharias, N., Schmithausen, R.M., Engelhart, S., Exner, M., Parcina, M., Schreiber, C.,  
424 Bierbaum, G., 2018. Dissemination of multi-resistant Gram-negative bacteria into German

- 425 wastewater and surface waters. *FEMS microbiology ecology* 94 (5).  
426 <https://doi.org/10.1093/femsec/fiy057>.
- 427 Otter, J.A., Donskey, C., Yezli, S., Douthwaite, S., Goldenberg, S.D., Weber, D.J., 2016. Transmission of  
428 SARS and MERS coronaviruses and influenza virus in healthcare settings: the possible role of dry  
429 surface contamination. *The Journal of hospital infection* 92 (3), 235–250.  
430 <https://doi.org/10.1016/j.jhin.2015.08.027>.
- 431 Paules, C.I., Marston, H.D., Fauci, A.S., 2020. Coronavirus Infections-More Than Just the Common  
432 Cold. *JAMA*. <https://doi.org/10.1001/jama.2020.0757>.
- 433 Qian, H., Miao, T., LIU, L., Zheng, X., Luo, D., Li, Y., 2020. Indoor transmission of SARS-CoV-2.  
434 Schmithausen, R.M., Döhla, M., Schößler, H., Diegmann, C., Schulte, B., Richter, E., Eis-Hübinger, A.-  
435 M., Streeck, H., 2020. Characteristic Temporary Loss of Taste and Olfactory Senses in SARS-CoV-2-  
436 positive-Individuals with Mild Symptoms. *Pathogens and Immunity* 5 (1), 117–120.  
437 <https://doi.org/10.20411/pai.v5i1.374>.
- 438 Service, R., 2020. Does disinfecting surfaces really prevent the spread of coronavirus? *Science*.  
439 <https://doi.org/10.1126/science.abb7058>.
- 440 Sib, E., Voigt, A.M., Wilbring, G., Schreiber, C., Faerber, H.A., Skutlarek, D., Parcina, M., Mahn, R.,  
441 Wolf, D., Brossart, P., Geiser, F., Engelhart, S., Exner, M., Bierbaum, G., Schmithausen, R.M., 2019.  
442 Antibiotic resistant bacteria and resistance genes in biofilms in clinical wastewater networks.  
443 *International journal of hygiene and environmental health* 222 (4), 655–662.  
444 <https://doi.org/10.1016/j.ijheh.2019.03.006>.
- 445 Streeck, H., Hartmann, G., Exner, M., Schmid, M., 2020a. Preliminary result and conclusions of the  
446 COVID-19 case cluster study (Gangelt Municipality).  
447 [https://www.land.nrw/sites/default/files/asset/document/zwischenenergebnis\\_covid19\\_case\\_study\\_gangelt\\_en.pdf](https://www.land.nrw/sites/default/files/asset/document/zwischenenergebnis_covid19_case_study_gangelt_en.pdf) (accessed 25 April 2020).
- 448  
449 Streeck, H., Schulte, B., Kummerer, B., Richter, E., Hoeller, T., Fuhrmann, C., Bartok, E., Dolscheid, R.,  
450 Berger, M., Wessendorf, L., Eschbach-Bludau, M., Kellings, A., Schwaiger, A., Coenen, M.,  
451 Hoffmann, P., Noethen, M., Eis-Huebinger, A.-M., Exner, M., Schmithausen, R., Schmid, M.,  
452 2020b. Infection fatality rate of SARS-CoV-2 infection in a German community with a super-  
453 spreading event.
- 454 van Doremalen, N., Bushmaker, T., Morris, D.H., Holbrook, M.G., Gamble, A., Williamson, B.N.,  
455 Tamin, A., Harcourt, J.L., Thornburg, N.J., Gerber, S.I., Lloyd-Smith, J.O., Wit, E. de, Munster, V.J.,  
456 2020. Aerosol and Surface Stability of SARS-CoV-2 as Compared with SARS-CoV-1. *The New*  
457 *England journal of medicine* 382 (16), 1564–1567. <https://doi.org/10.1056/NEJMc2004973>.
- 458 Verreault, D., Moineau, S., Duchaine, C., 2008. Methods for sampling of airborne viruses.  
459 *Microbiology and molecular biology reviews* : MMBR 72 (3), 413–444.  
460 <https://doi.org/10.1128/MMBR.00002-08>.
- 461 Voigt, A.M., Ciorba, P., Döhla, M., Exner, M., Felder, C., Lenz-Plet, F., Sib, E., Skutlarek, D.,  
462 Schmithausen, R.M., Faerber, H.A., 2020. The investigation of antibiotic residues, antibiotic  
463 resistance genes and antibiotic-resistant organisms in a drinking water reservoir system in  
464 Germany. *International journal of hygiene and environmental health* 224, 113449.  
465 <https://doi.org/10.1016/j.ijheh.2020.113449>.
- 466 Voigt, A.M., Faerber, H.A., Wilbring, G., Skutlarek, D., Felder, C., Mahn, R., Wolf, D., Brossart, P.,  
467 Hornung, T., Engelhart, S., Exner, M., Schmithausen, R.M., 2019. The occurrence of antimicrobial  
468 substances in toilet, sink and shower drainpipes of clinical units: A neglected source of antibiotic  
469 residues. *International journal of hygiene and environmental health* 222 (3), 455–467.  
470 <https://doi.org/10.1016/j.ijheh.2018.12.013>.

- 471 Wang, D., Hu, B., Hu, C., et al., 2020a. Clinical characteristics of 138 hospitalized patients with 2019  
472 novel coronavirus–infected pneumonia in Wuhan, China. *JAMA*.  
473 <https://doi.org/10.1001/jama.2020.1585.10>.
- 474 Wang, L., Li, X., Chen, H., Yan, S., Li, Y., Li, D., Gong, Z., 2020b. SARS-CoV-2 infection does not  
475 significantly cause acute renal injury: an analysis of 116 hospitalized patients with COVID-19 in a  
476 single hospital, Wuhan, China.
- 477 Wang, W., Xu, Y., Gao, R., Lu, R., Han, K., Wu, G., Tan, W., 2020c. Detection of SARS-CoV-2 in  
478 Different Types of Clinical Specimens. *JAMA*. <https://doi.org/10.1001/jama.2020.3786>.
- 479 Wang, X.W., Li, J., Guo, T., Zhen, B., Kong, Q., Yi, B., Li, Z., Song, N., Jin, M., Xiao, W., Zhu, X., Gu, C.,  
480 Yin, J., Wei, W., Yao, W., Liu, C., Ou, G., Wang, M., Fang, T., Wang, G., Qiu, Y., Wu, H., Chao, F.,  
481 2005. Concentration and detection of SARS coronavirus in sewage from Xiao Tang Shan hospital  
482 and the 309th Hospital of the Chinese People's Liberation Army. *Water Science and Technology*  
483 52 (8), 213–221. <https://doi.org/10.2166/wst.2005.0266>.
- 484 WHO, 2020a. Coronavirus disease 2019 (COVID-19): Situation Report – 95.  
485 [https://www.who.int/docs/default-source/coronaviruse/situation-reports/20200424-sitrep-95-](https://www.who.int/docs/default-source/coronaviruse/situation-reports/20200424-sitrep-95-covid-19.pdf?sfvrsn=e8065831_4)  
486 [covid-19.pdf?sfvrsn=e8065831\\_4](https://www.who.int/docs/default-source/coronaviruse/situation-reports/20200424-sitrep-95-covid-19.pdf?sfvrsn=e8065831_4) (accessed 25 April 2020).
- 487 WHO, 2020b. Home care for patients with COVID-19 presenting with mild symptoms and  
488 management of their contacts.
- 489 WHO, 2020c. Surface sampling of coronavirus disease (COVID-19): A practical “how to” protocol for  
490 health care and public health professionals.  
491 [https://apps.who.int/iris/bitstream/handle/10665/331058/WHO-2019-nCoV-](https://apps.who.int/iris/bitstream/handle/10665/331058/WHO-2019-nCoV-Environment_protocol-2020.1-eng.pdf)  
492 [Environment\\_protocol-2020.1-eng.pdf](https://apps.who.int/iris/bitstream/handle/10665/331058/WHO-2019-nCoV-Environment_protocol-2020.1-eng.pdf) (accessed 25 April 2020).
- 493 Wu, Y., Guo, C., Tang, L., Hong, Z., Zhou, J., Dong, X., Yin, H., Xiao, Q., Tang, Y., Qu, X., Kuang, L., Fang,  
494 X., Mishra, N., Lu, J., Shan, H., Jiang, G., Huang, X., 2020. Prolonged presence of SARS-CoV-2 viral  
495 RNA in faecal samples. *The Lancet Gastroenterology & Hepatology* 5 (5), 434–435.  
496 [https://doi.org/10.1016/S2468-1253\(20\)30083-2](https://doi.org/10.1016/S2468-1253(20)30083-2).
- 497 Yeo, C., Kaushal, S., Yeo, D., 2020. Enteric involvement of coronaviruses: is faecal–oral transmission  
498 of SARS-CoV-2 possible? *The Lancet Gastroenterology & Hepatology* 5 (4), 335–337.  
499 [https://doi.org/10.1016/S2468-1253\(20\)30048-0](https://doi.org/10.1016/S2468-1253(20)30048-0).
- 500 Zhang, Y., Chen, C., Zhu, S., Shu, C., Wang, D., Song J, 2020. Isolation of 2019-nCoV from a stool  
501 specimen of a laboratory-confirmed case of the coronavirus disease 2019 (COVID-19). *China CDC*  
502 *Weekly* 2 (8), 123–124. <https://doi.org/10.46234/ccdcw2020.033>.
